# Supplementary material for: Oridonin promotes endoplasmic reticulum stress via TP53-repressed TCF4 transactivation in colorectal cancer
Source: Springer Nature journal article supplement (doi:10.1186/s13046-023-02702-4), 2023-06-19
Supplement: 13046_2023_2702_MOESM1_ESM.pdf [file 13046_2023_2702_MOESM1_ESM.pdf]

**Table S1. TCF4 target genes survival and correlation analysis in colorectal cancer**

| TCF4        | GSE17538          |                 |              |                 |
|-------------|-------------------|-----------------|--------------|-----------------|
|             | Survival          |                 | Correlation  |                 |
|             | status (is worse) | p-value         | r-value      | p-value         |
| AGR2        | high              | 0.107           | -0.215       | 9.75E-04        |
| AQP11       | low               | 0.026           | -0.099       | 0.133           |
| BRSK2       | low               | 0.018           | -0.245       | 1.66E-04        |
| CCND1       | high              | 0.058           | -0.104       | 0.115           |
| <b>CFTR</b> | <b>low</b>        | <b>5.00E-04</b> | <b>-0.22</b> | <b>7.35E-04</b> |
| COPS5       | low               | 0.093           | -0.159       | 0.016           |
| CREB3L3     | high              | 0.102           | 0.09         | 0.17            |
| DDX3X       | high              | 0.045           | 0.067        | 0.309           |
| DNAJB14     | high              | 0.044           | 0.329        | 2.86E-07        |
| EIF2B5      | low               | 0.048           | -0.344       | 7.61E-08        |
| EIF4G1      | low               | 0.065           | -0.278       | 1.68E-05        |
| ELAVL4      | low               | 4.50E-03        | 0.072        | 0.278           |
| ERP29       | high              | 7.30E-04        | -0.396       | 4.09E-10        |
| ERP44       | high              | 0.016           | -0.178       | 6.68E-03        |
| FBXO27      | low               | 0.068           | -0.081       | 0.218           |
| <b>FYN</b>  | <b>high</b>       | <b>2.40E-03</b> | <b>0.539</b> | <b>7.38E-19</b> |
| GET4        | low               | 0.182           | -0.118       | 0.074           |
| INSIG2      | high              | 1.60E-03        | 0.26         | 6.30E-05        |
| MANF        | high              | 0.025           | -0.153       | 0.02            |
| NCK2        | low               | 0.041           | -0.026       | 0.698           |
| NUPR1       | low               | 0.068           | 0.128        | 0.052           |
| PARK7       | low               | 0.016           | -0.236       | 2.88E-04        |
| PIK3R1      | high              | 0.1             | 0.172        | 8.52E-03        |
| PTPN2       | high              | 2.90E-03        | -0.093       | 0.156           |
| RNF103      | low               | 0.03            | -0.022       | 0.735           |

|             |                          |                 |                    |                 |
|-------------|--------------------------|-----------------|--------------------|-----------------|
| RNF183      | high                     | 4.30E-04        | -0.281             | 1.45E-05        |
| RNF186      | low                      | 7.70E-04        | -0.255             | 8.78E-05        |
| SEL1L       | high                     | 0.013           | 0.19               | 3.70E-03        |
| SEL1L2      | low                      | 4.20E-03        | -0.036             | 0.582           |
| SESN2       | low                      | 0.048           | -0.08              | 0.226           |
| SGTA        | low                      | 0.065           | -0.227             | 4.82E-04        |
| SGTB        | high                     | 8.60E-04        | 0.132              | 0.045           |
| TMEM33      | low                      | 0.067           | -0.353             | 3.41E-08        |
| TMUB2       | low                      | 0.107           | 0.051              | 0.438           |
| TRIM25      | low                      | 1.40E-03        | -0.279             | 1.57E-05        |
| UBE2J1      | low                      | 1.50E-03        | 0.13               | 0.047           |
| UGGT1       | high                     | 0.073           | -0.222             | 6.72E-04        |
| <b>YOD1</b> | <b>high</b>              | <b>1.80E-03</b> | <b>0.524</b>       | <b>8.64E-18</b> |
| <b>TCF4</b> | <b>GSE14333</b>          |                 |                    |                 |
|             | <b>Survival</b>          |                 | <b>Correlation</b> |                 |
|             | <b>status (is worse)</b> | <b>p-value</b>  | <b>r-value</b>     | <b>p-value</b>  |
| AGR2        | high                     | 0.049           | -0.352             | 7.13E-10        |
| AQP11       | low                      | 1.00E-04        | -0.086             | 0.145           |
| BRSK2       | low                      | 2.90E-04        | -0.221             | 1.49E-04        |
| CCND1       | high                     | 1.90E-03        | -0.21              | 3.23E-04        |
| <b>CFTR</b> | <b>low</b>               | <b>5.00E-05</b> | <b>-0.211</b>      | <b>2.87E-04</b> |
| COPS5       | high                     | 1.80E-03        | -0.270             | 3.16E-06        |
| CREB3L3     | low                      | 3.30E-03        | 0.143              | 0.015           |
| DDX3X       | low                      | 3.30E-05        | 0.03               | 0.608           |
| DNAJB14     | high                     | 1.30E-03        | 0.344              | 1.83E-09        |
| EIF2B5      | low                      | 8.70E-04        | -0.471             | 2.06E-17        |
| EIF4G1      | low                      | 0.011           | -0.449             | 8.28E-16        |
| ELAVL4      | low                      | 0.042           | 0.17               | 3.73E-03        |
| ERP29       | low                      | 2.10E-03        | -0.401             | 1.25E-12        |

|             |                          |                 |                    |                 |
|-------------|--------------------------|-----------------|--------------------|-----------------|
| ERP44       | low                      | 3.00E-03        | -0.37              | 7.25E-11        |
| FBXO27      | low                      | 0.04            | 0.176              | 2.58E-03        |
| <b>FYN</b>  | <b>high</b>              | <b>1.60E-03</b> | <b>0.56</b>        | <b>2.20E-25</b> |
| GET4        | high                     | 6.80E-03        | -0.039             | 0.513           |
| INSIG2      | high                     | 2.70E-05        | 0.152              | 9.67E-03        |
| MANF        | low                      | 0.024           | -0.114             | 0.053           |
| NCK2        | high                     | 0.028           | -0.077             | 0.193           |
| NUPR1       | high                     | 0.045           | 0.223              | 1.29E-04        |
| PARK7       | low                      | 1.10E-03        | -0.268             | 3.83E-06        |
| PIK3R1      | low                      | 2.00E-04        | 0.203              | 5.01E-04        |
| PTPN2       | high                     | 0.031           | -0.268             | 3.63E-06        |
| RNF103      | low                      | 0.045           | -0.089             | 0.129           |
| RNF183      | low                      | 0.039           | -0.202             | 5.36E-04        |
| RNF186      | low                      | 5.40E-04        | -0.218             | 1.80E-04        |
| SEL1L       | high                     | 0.025           | 0.01               | 0.861           |
| SEL1L2      | high                     | 5.70E-03        | -0.095             | 0.106           |
| SESN2       | high                     | 0.01            | 0.041              | 0.486           |
| SGTA        | low                      | 0.015           | -0.129             | 0.028           |
| SGTB        | high                     | 7.60E-03        | -0.132             | 0.024           |
| TMEM33      | low                      | 0.028           | -0.49              | 5.98E-19        |
| TMUB2       | high                     | 8.20E-03        | 0.101              | 0.087           |
| TRIM25      | low                      | 3.10E-05        | -0.174             | 2.89E-03        |
| UBE2J1      | high                     | 0.043           | 0.053              | 0.368           |
| UGGT1       | low                      | 3.70E-05        | -0.213             | 2.63E-04        |
| <b>YOD1</b> | <b>high</b>              | <b>4.50E-03</b> | <b>0.525</b>       | <b>6.43E-22</b> |
| <b>TCF4</b> | <b>GSE33114</b>          |                 |                    |                 |
|             | <b>Survival</b>          |                 | <b>Correlation</b> |                 |
|             | <b>status (is worse)</b> | <b>p-value</b>  | <b>r-value</b>     | <b>p-value</b>  |
| AGR2        | high                     | 0.066           | -0.243             | 0.011           |

|             |             |                 |               |                 |
|-------------|-------------|-----------------|---------------|-----------------|
| AQP11       | low         | 3.80E-03        | -0.138        | 0.156           |
| BRSK2       | low         | 0.136           | 0.032         | 0.741           |
| CCND1       | low         | 6.10E-03        | 0.28          | 3.28E-03        |
| <b>CFTR</b> | <b>low</b>  | <b>0.013</b>    | <b>-0.162</b> | <b>2.51E-04</b> |
| COPS5       | low         | 0.464           | -0.711        | 7.07E-18        |
| CREB3L3     | high        | 0.057           | -0.052        | 0.596           |
| DDX3X       | high        | 0.107           | -0.440        | 1.86E-06        |
| DNAJB14     | high        | 0.081           | 0.474         | 2.27E-07        |
| EIF2B5      | low         | 0.029           | -0.765        | 5.30E-22        |
| EIF4G1      | low         | 5.80E-04        | -0.513        | 1.33E-08        |
| ELAVL4      | high        | 0.092           | 0.249         | 9.44E-03        |
| ERP29       | low         | 0.064           | -0.458        | 6.11E-07        |
| ERP44       | low         | 0.287           | -0.271        | 4.52E-03        |
| FBXO27      | high        | 0.044           | 0.229         | 0.017           |
| <b>FYN</b>  | <b>high</b> | <b>1.80E-04</b> | <b>0.572</b>  | <b>9.66E-11</b> |
| GET4        | low         | 4.10E-03        | 0.018         | 0.855           |
| INSIG2      | high        | 0.022           | 0.026         | 0.792           |
| MANF        | high        | 0.107           | -0.032        | 0.743           |
| NCK2        | low         | 0.075           | -0.247        | 9.90E-03        |
| NUPR1       | high        | 1.90E-03        | 0.701         | 2.86E-17        |
| PARK7       | high        | 0.109           | -0.503        | 2.95E-08        |
| PIK3R1      | low         | 2.10E-03        | 0.14          | 0.147           |
| PTPN2       | high        | 0.074           | -0.064        | 0.513           |
| RNF103      | high        | 0.181           | 0.506         | 2.33E-08        |
| RNF183      | high        | 0.206           | 0.065         | 0.501           |
| RNF186      | low         | 0.164           | 0.259         | 6.70E-03        |
| SEL1L       | high        | 8.50E-03        | 0.436         | 2.35E-06        |
| SEL1L2      | high        | 3.90E-03        | -0.011        | 0.912           |
| SESN2       | low         | 0.152           | 0.247         | 0.010           |

|             |             |              |              |                 |
|-------------|-------------|--------------|--------------|-----------------|
| SGTA        | low         | 0.016        | -0.422       | 5.50E-06        |
| SGTB        | high        | 0.102        | -0.129       | 0.184           |
| TMEM33      | low         | 0.127        | -0.58        | 4.97E-11        |
| TMUB2       | low         | 0.242        | 0.185        | 0.055           |
| TRIM25      | low         | 0.06         | -0.199       | 0.039           |
| UBE2J1      | high        | 0.022        | 0.595        | 1.13E-11        |
| UGGT1       | low         | 4.80E-04     | -0.33        | 4.86E-04        |
| <b>YOD1</b> | <b>high</b> | <b>0.015</b> | <b>0.644</b> | <b>5.49E-14</b> |
